# Supplementary material for: Global Patterns of Bacterial Beta-Diversity in Seafloor and Seawater Ecosystems
Source: PLoS One. 2011 Sep 8;6(9):e24570. doi: 10.1371/journal.pone.0024570 (PMC3169623; doi:10.1371/journal.pone.0024570)
Supplement: Table S3 — Variation of bacterial composition (OTU0.03) explained by various contextual parameters. (DOC) [file pone.0024570.s003.doc]

**Table S3. Variation of bacterial composition in OTU0.03 explained by various contextual parameters**

| Models | Total explained  (Y) | Ecosystem type  (E) | Spatial location  (S) | Time  (T) | Productivity  (P) | Covariation  (C) |
| --- | --- | --- | --- | --- | --- | --- |
| Pelagic |  |  |  |  |  |  |
| Y=E+S+T+P1+C | 25.8% | 7.7% | 3.5% | 0.9% | 1.4% | 12.4% |
| Y=E+S+T+P2+C | 27.9% | 11.0% | 2.6% | 1.3% | 3.5% | 9.4% |
| Y=E+S1+T+P+C | 28.9% | 12.1% | 2.1% | 1.2% | 5.1% | 8.4% |
| Y=E+S2+T+P+C | 27.3% | 8.8% | 0.6% | 1.2% | 6.0% | 10.7% |
| Benthic |  |  |  |  |  |  |
| Y=E+S+T+P1+C | 22.2% | 2.3% | 6.0% | 1.1% | 4.2% | 8.6% |
| Y=E+S+T+P2+C | 21.1% | 3.8% | 7.0% | 1.3% | 3.0% | 5.9% |
| Y=E+S1+T+P+C | 19.6% | 2.5% | 6.0% | 1.2% | 1.5% | 8.3% |
| Y=E+S2+T+P+C | 18.4% | 1.9% | 2.2% | 1.5% | 5.0% | 7.7% |

The original model is presented in Fig. S2. E = ecosystem type, S = PCoA-transformed latitudes and longitudes, water depth, T = number of days since the oldest sampling, and P = Longhurst’s primary production indices and capture fisheries yields. Different combinations of spatial variables or productivity were replaced in the original model: S1= PCoA-transformed latitudes and longitudes; S2 = water depth, P1 = Longhurst’s productivity indices, P2 = capture fisheries yields. R2 values are expressed here as percentage of explained variance. Significance of the pure effect of each parameter was assessed by 1000 Monte Carlo permutation tests. All adjusted R2 values were found highly significant (*P*<0.001). Covariation are not testable (See Fig. 4)
